# Supplementary material
Source: Elsevier journal article supplement (https://www.sciencedirect.com/science/article/pii/S0300893217305109)
Supplement: mmc1 [file S0300893217305109:mmc1.docx]

**MATERIAL SUPLEMENTARIO**

Se puede consultar material suplementario a este artículo en su versión electrónica disponible en: <http://dx.doi.org/10.1016/j.rec.2017.07.010>.
